# Supplementary material for: Rapid Identification of Antioxidant Compounds of Genista saharae Coss. & Dur. by Combination of DPPH Scavenging Assay and HPTLC-MS
Source: MDPI journal article supplement (doi:10.3390/molecules19044369), 2014-04-09

# Supplementary Materials

**Figure S1.** 5-Methoxy-4',7-trihydroxy-8-glucopyranosylisoflavone (**4**).

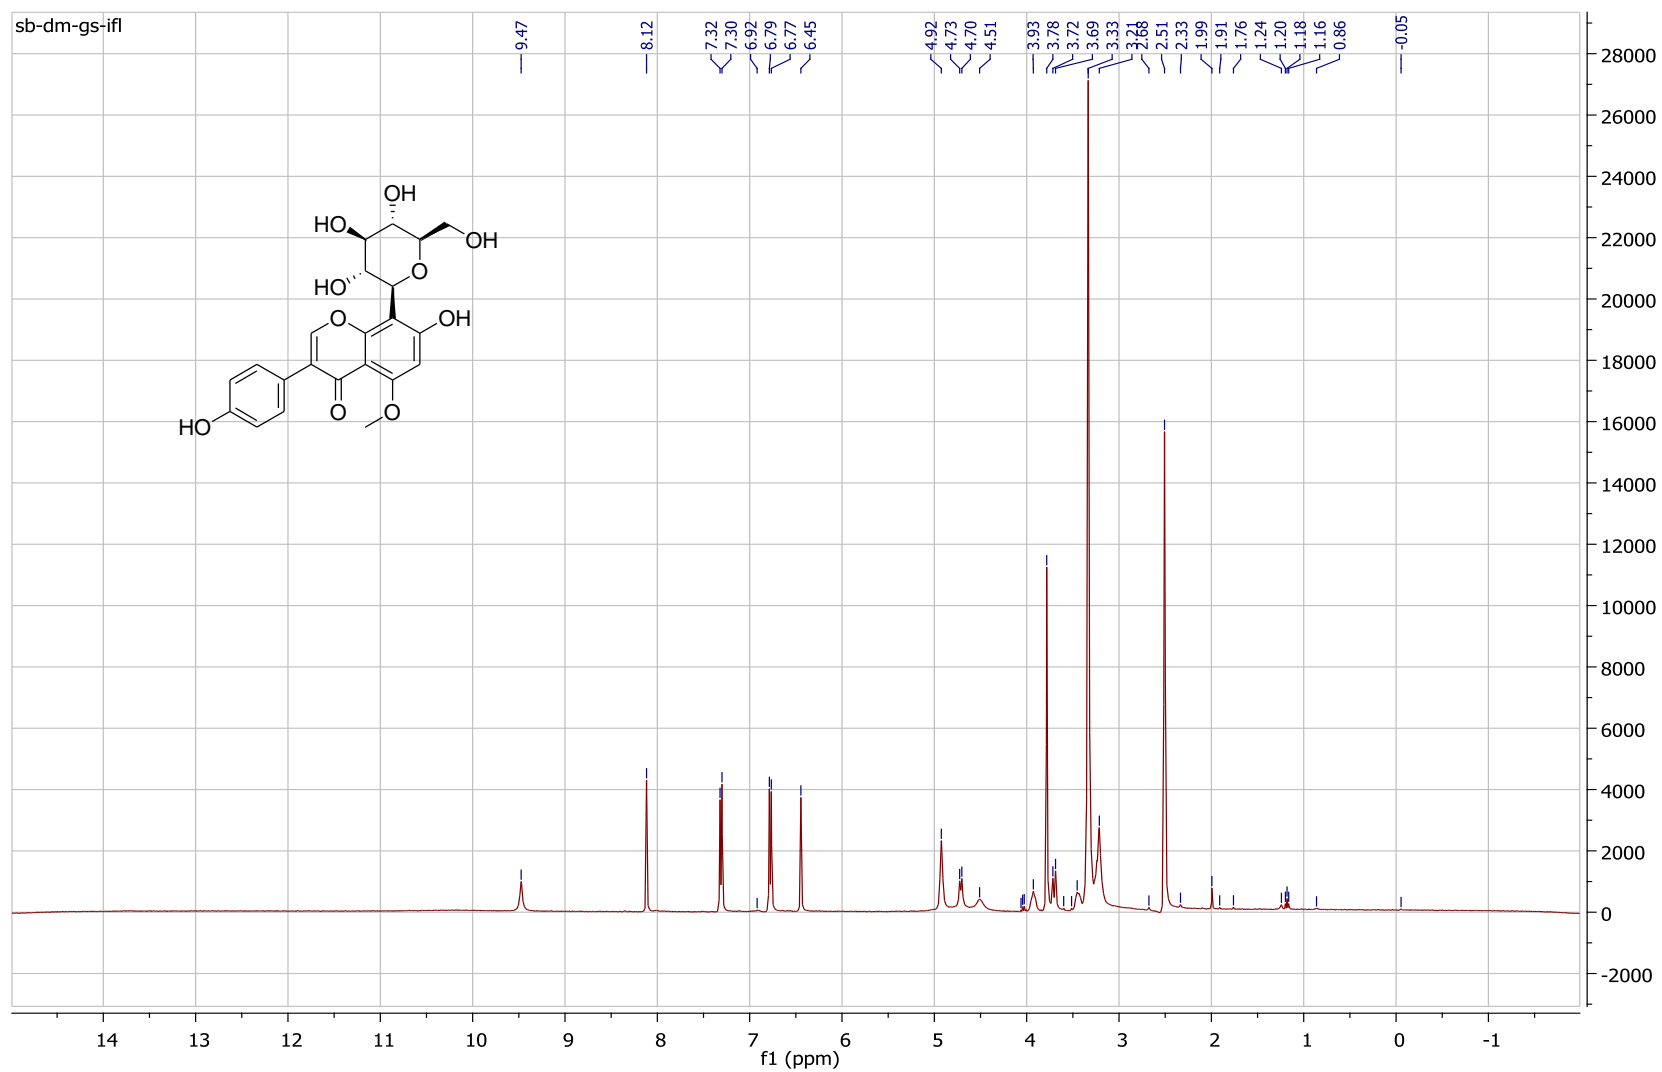

Figure S2. Spot A1.

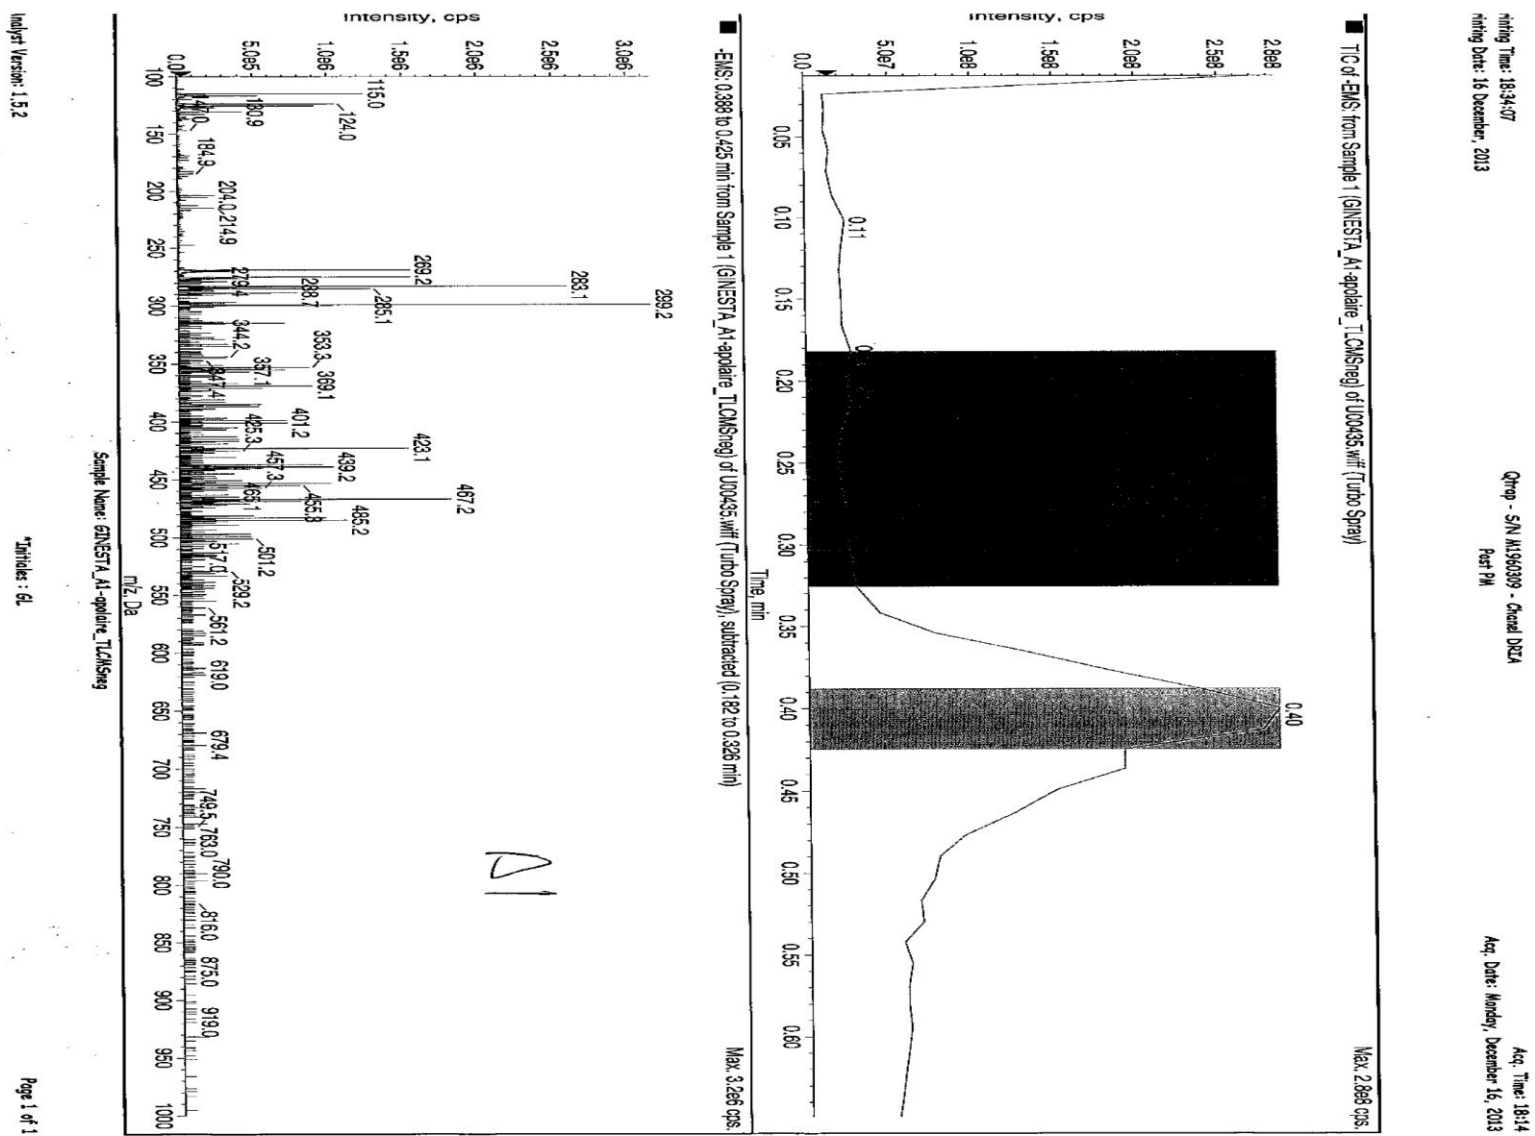

Figure S3. Spont A2 Compound 1.

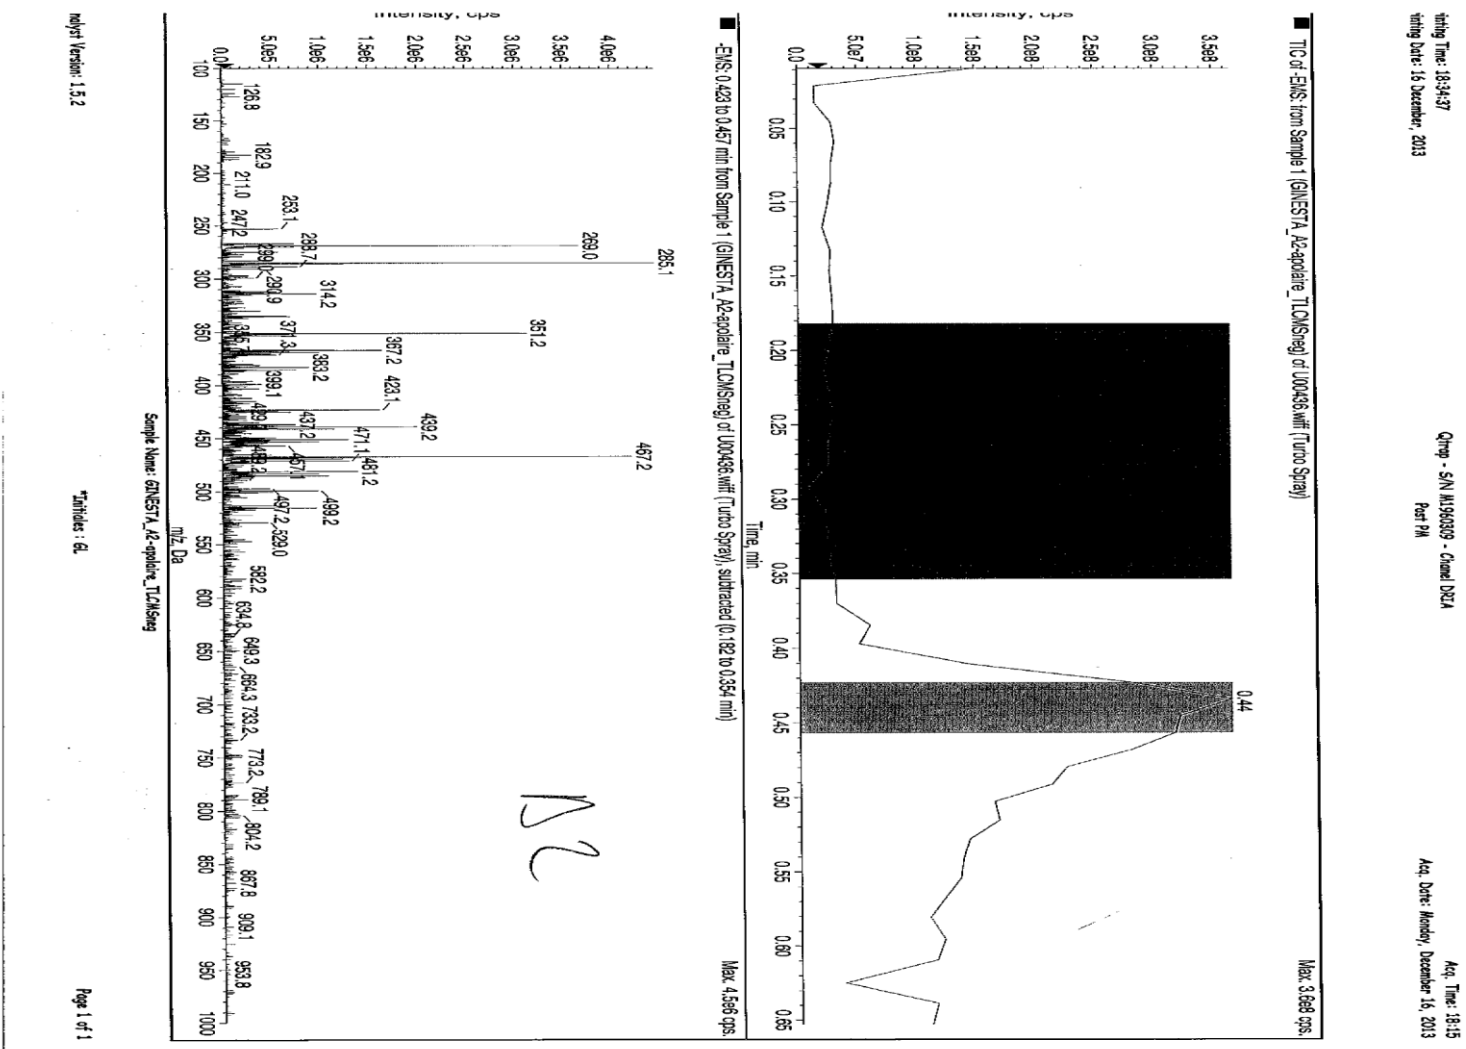

Figure S4. Spont A3 Compound 2.

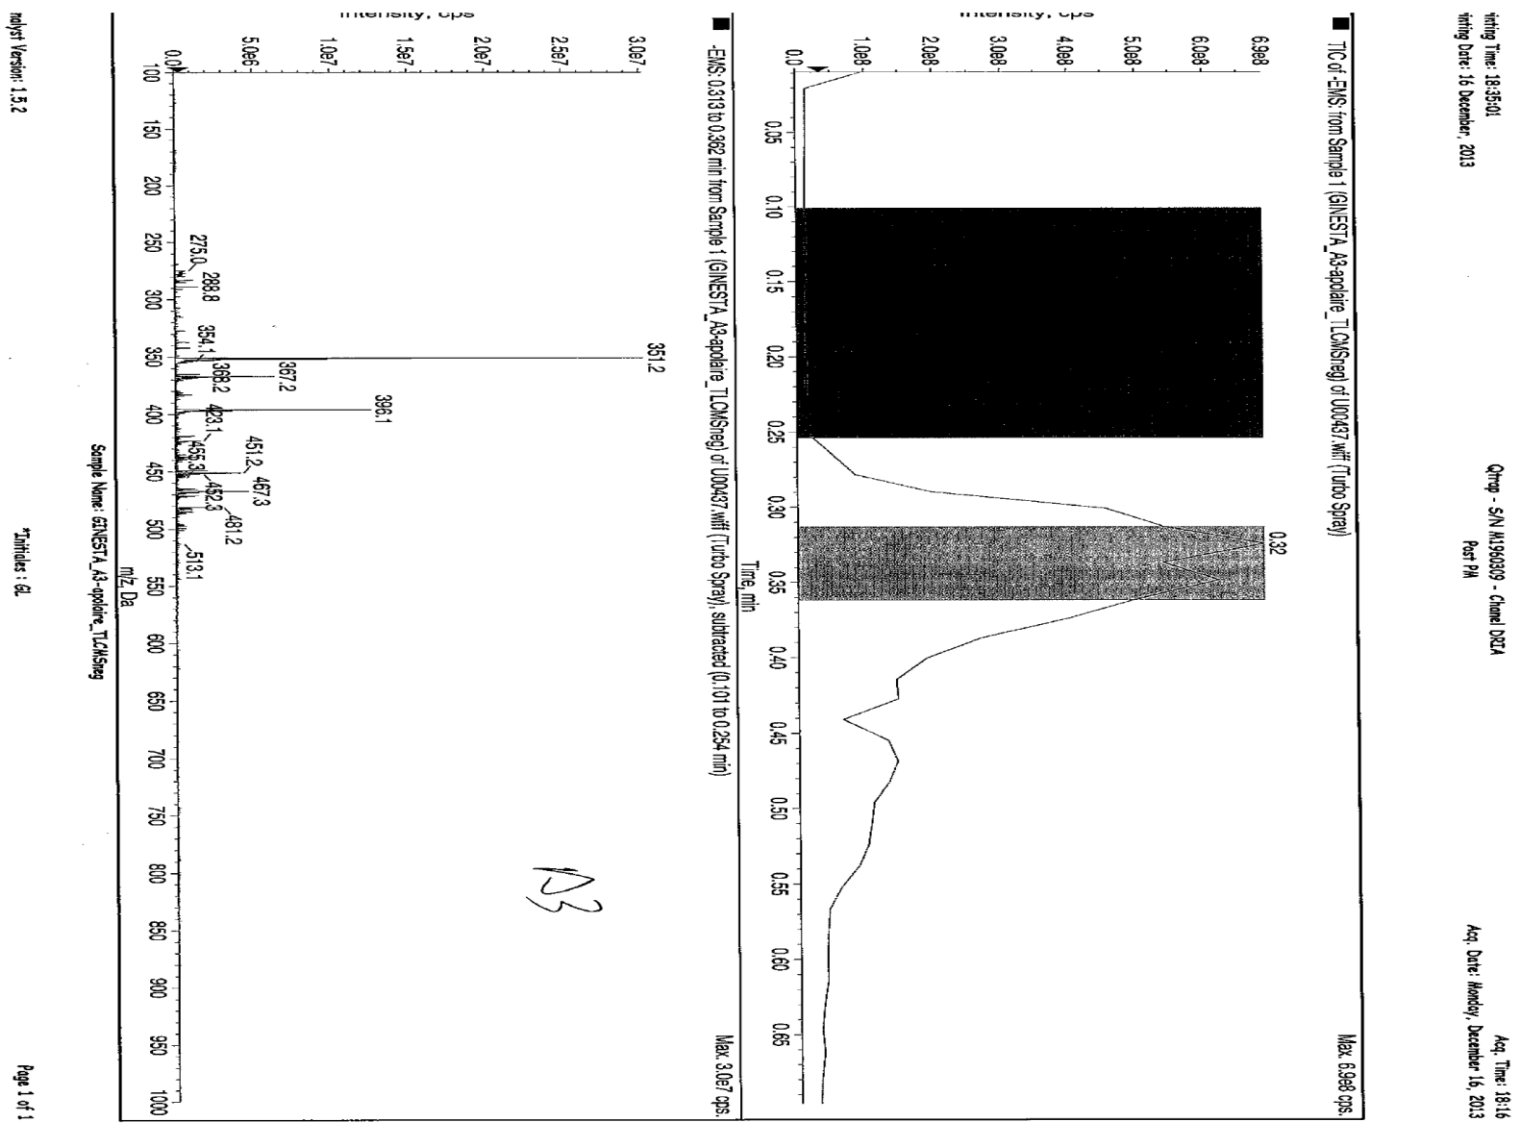

Figure S5. Spont A4.

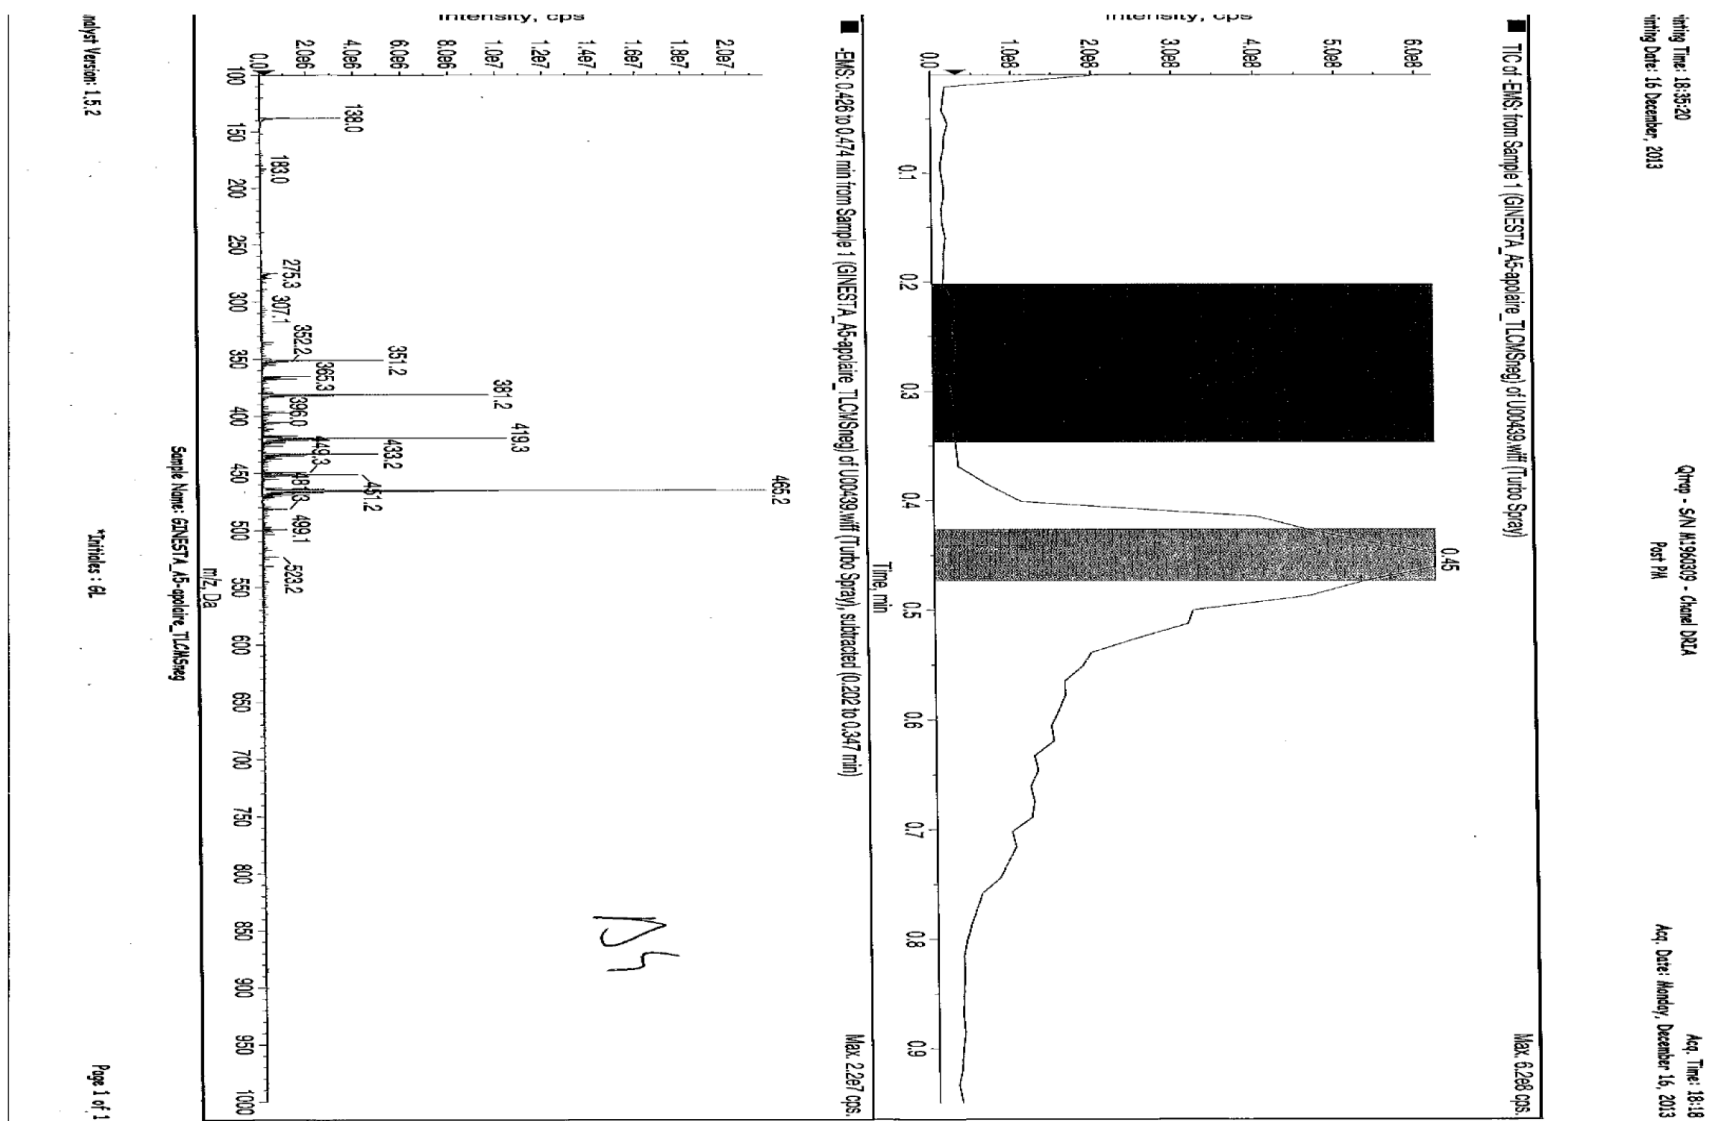

Figure S6. Spont A5 Compound 3.

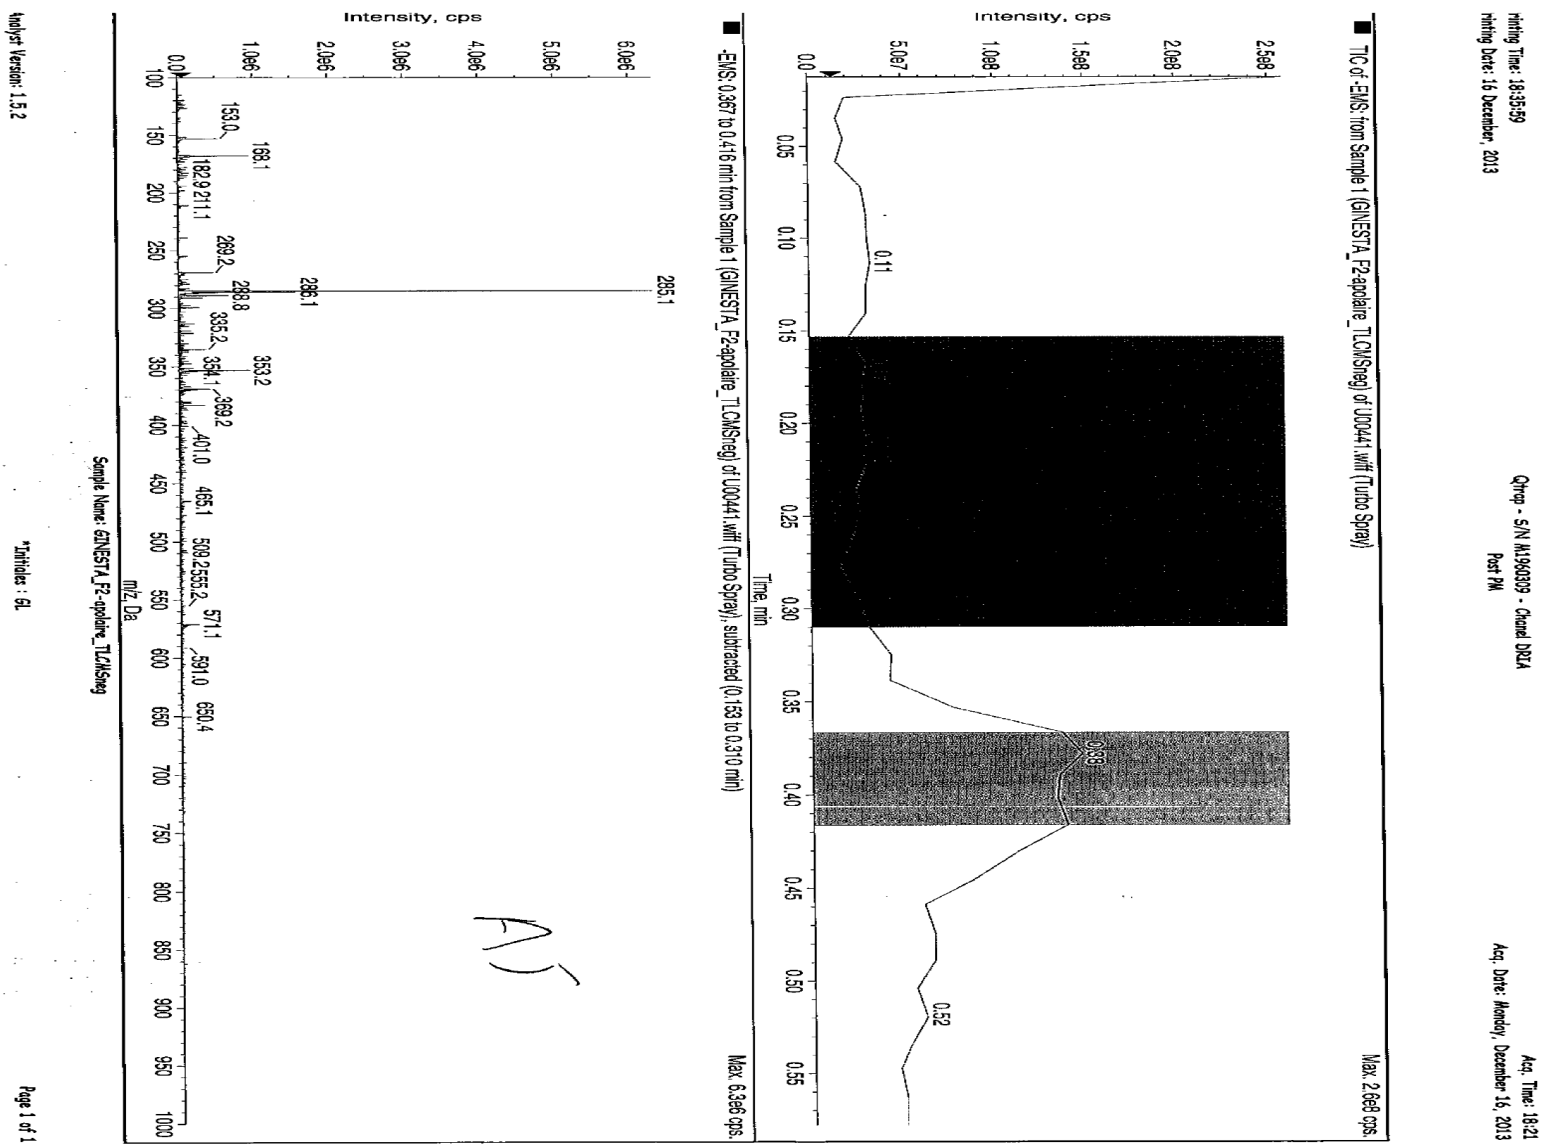

Figure S7. Spont B2 Compound 4.

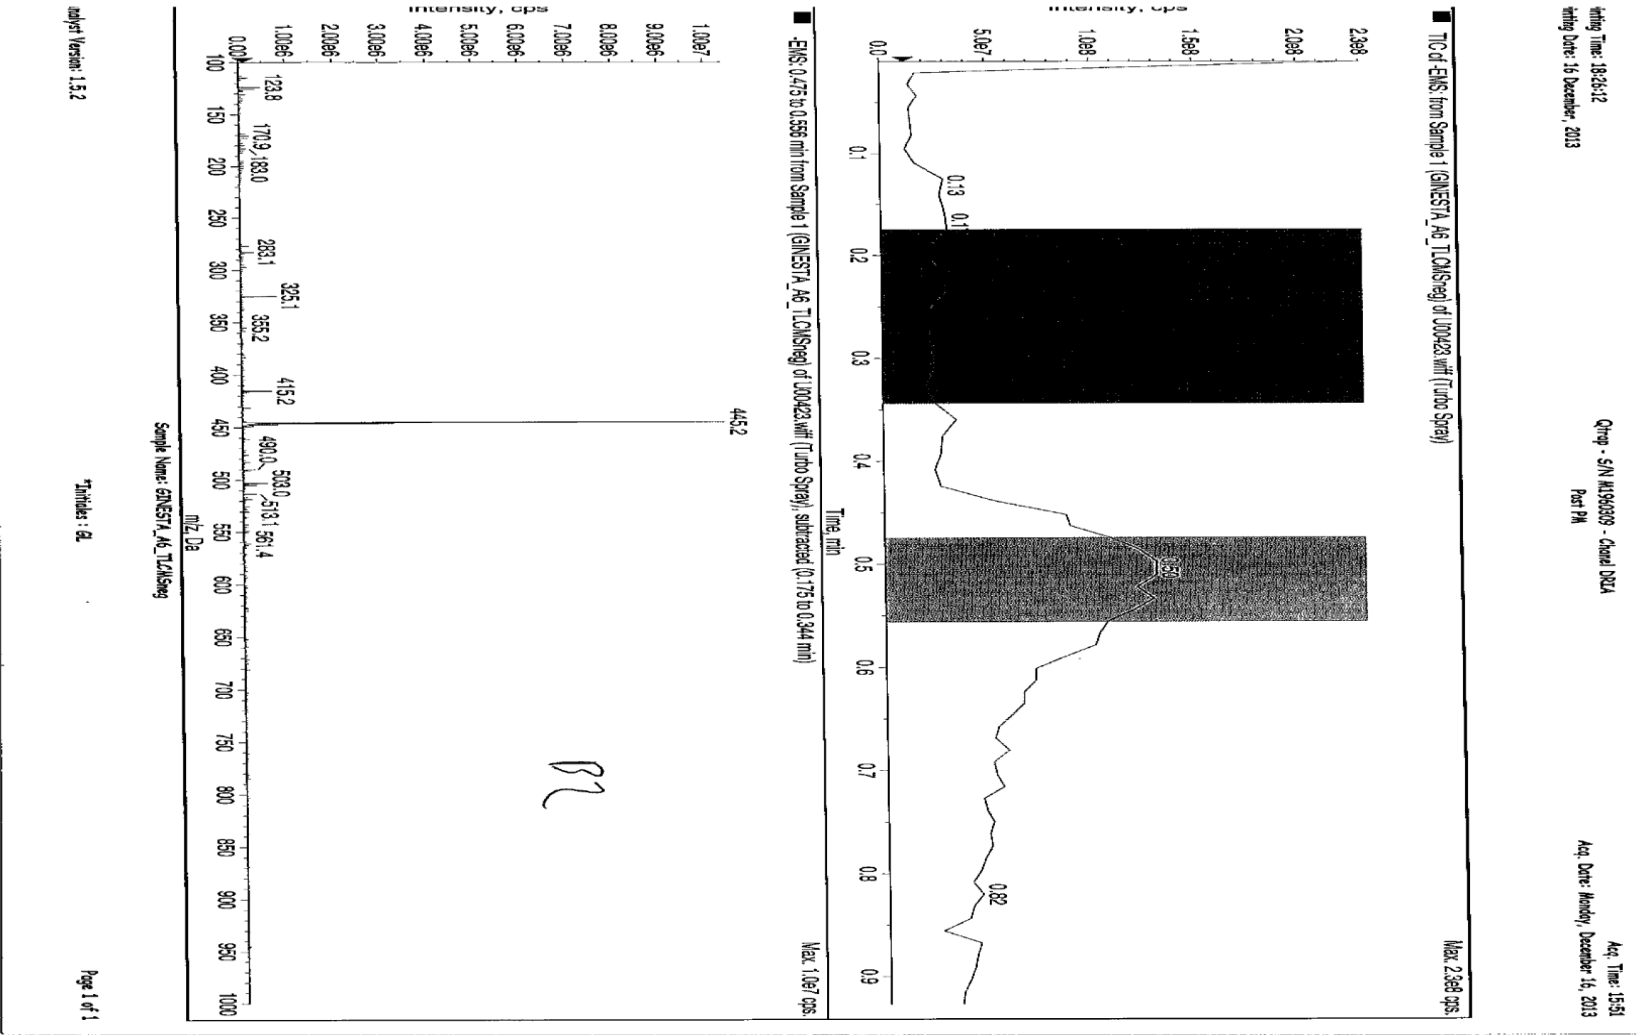

Figure S8. Spont B3 Compound 5.

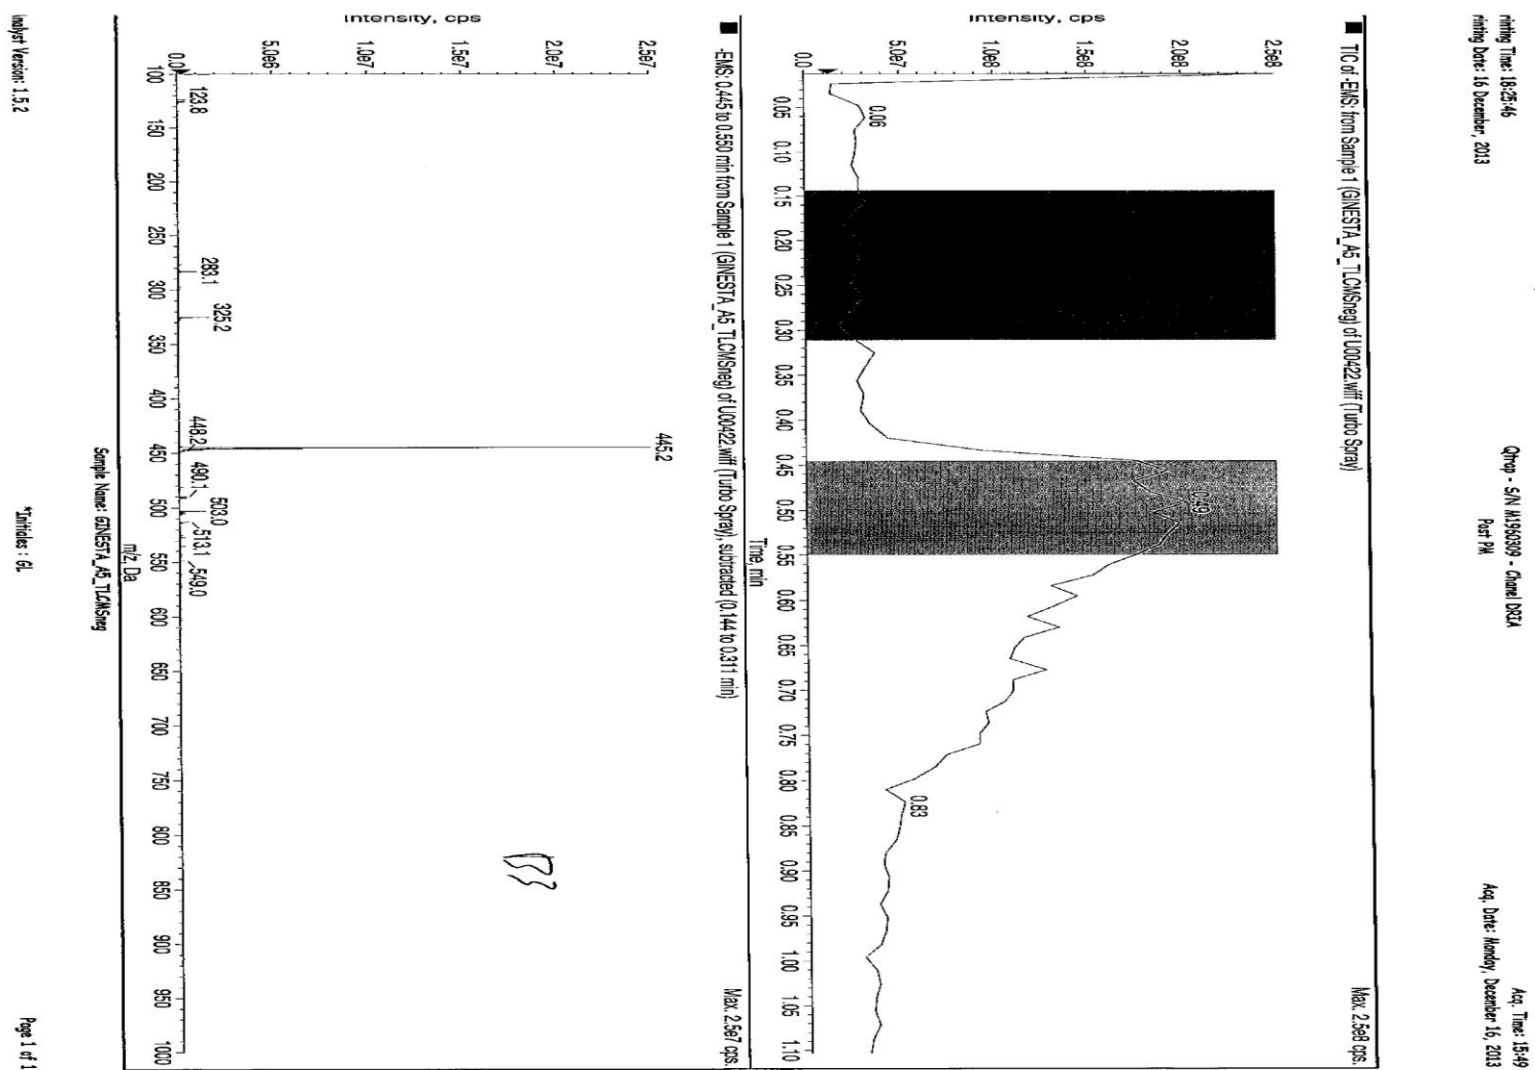



Figure S9. Spont B4 Compound 6.

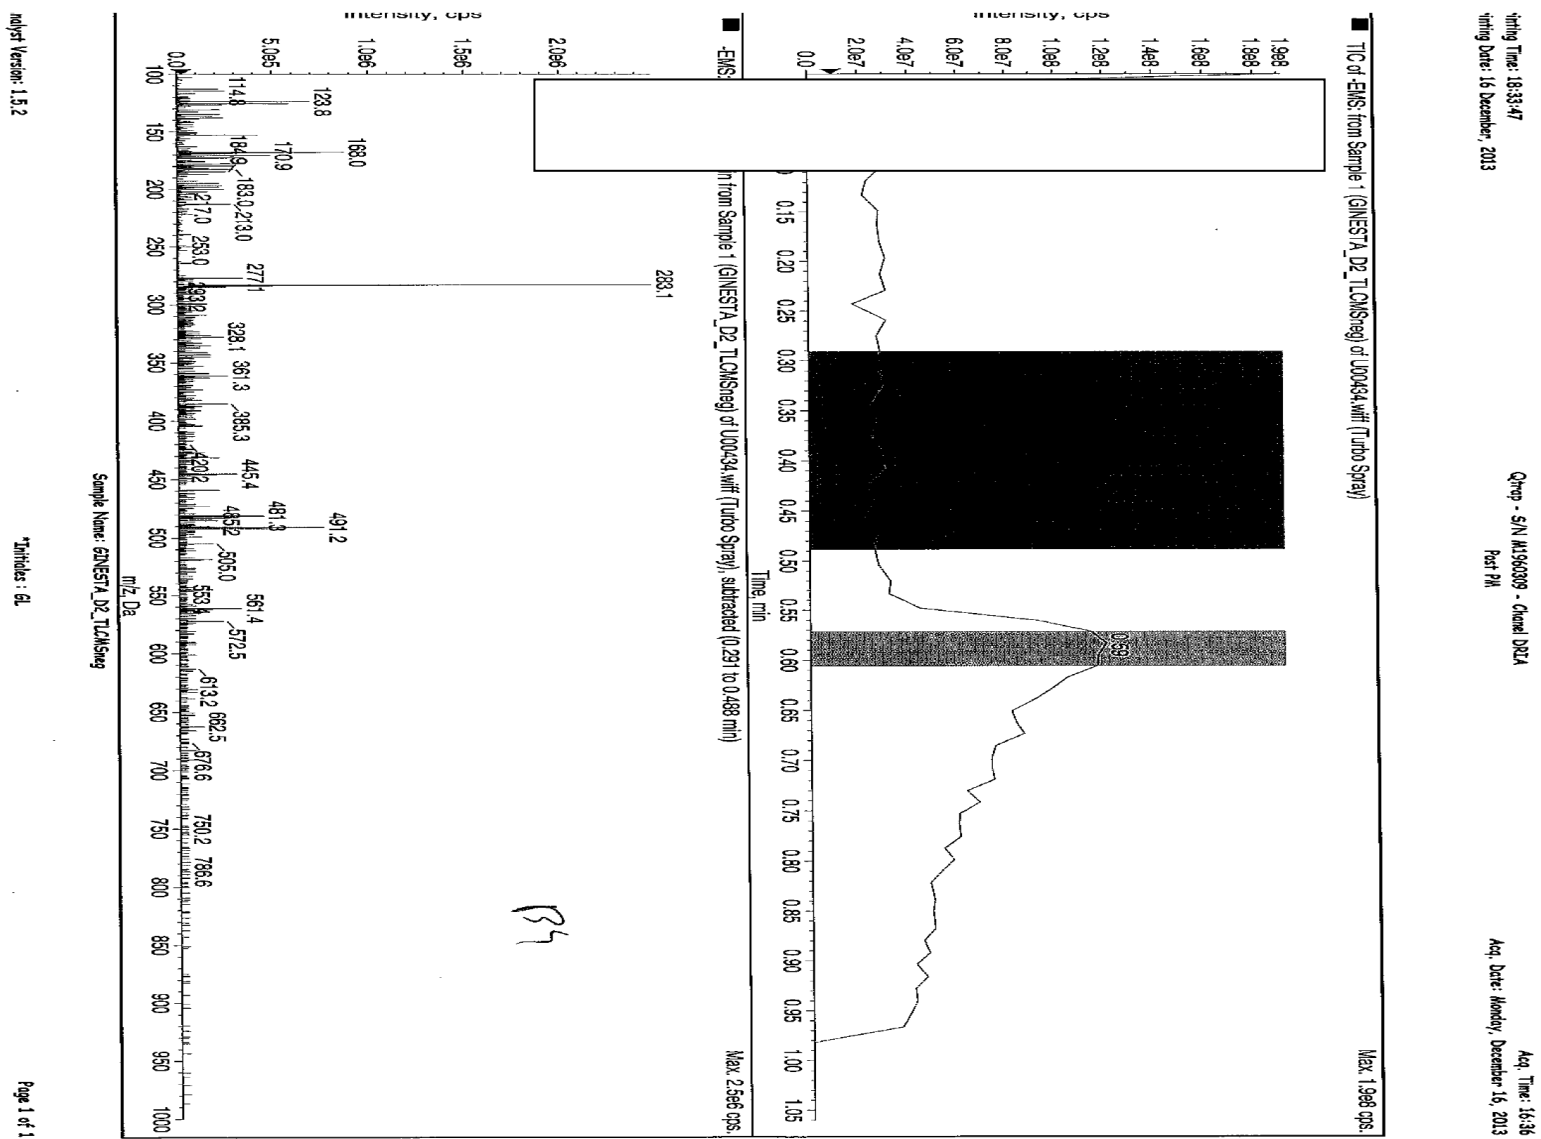

Figure S10. Spont B5.

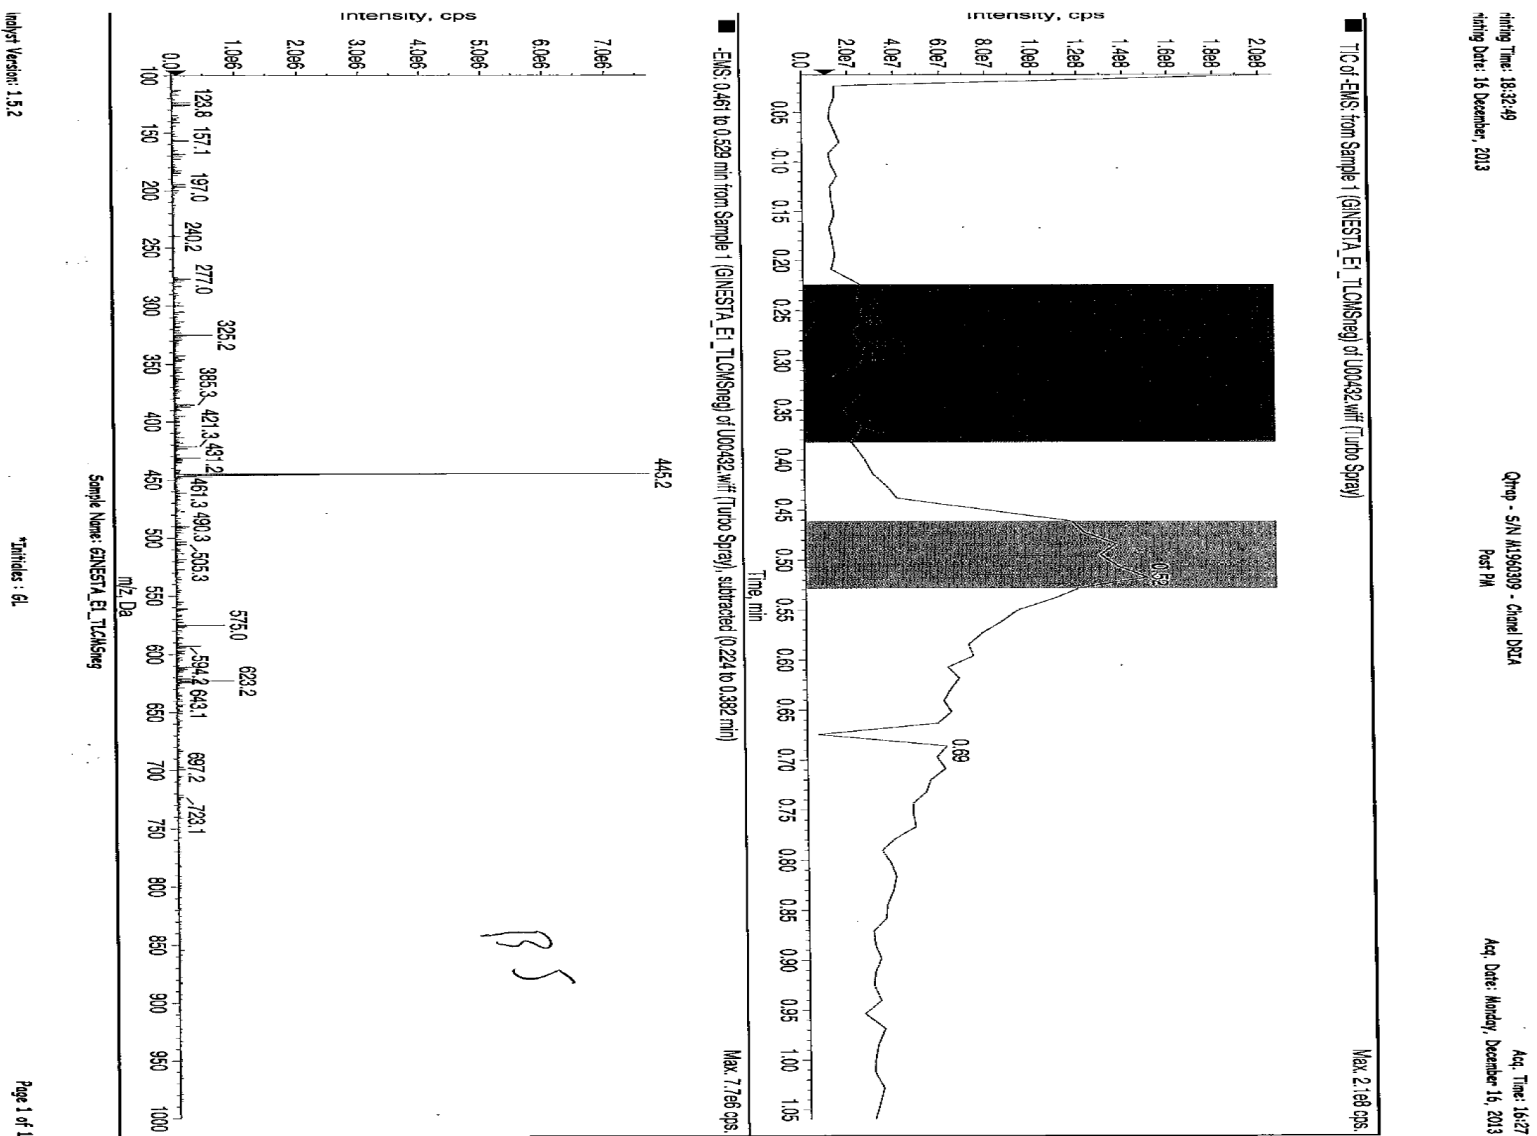

Supplement: s1 [file s1]
